# Supplementary material for: First clinical study of a pegylated diabody 124I-labeled PEG-AVP0458 in patients with tumor-associated glycoprotein 72 positive cancers
Source: PubMed Central journal article supplement (PMC7545991; doi:10.7150/thno.49422), 2020-09-15
Supplement: thnov10p11404s1.pdf [file thnov10p11404s1.pdf]

**Table S1.** Adverse Events

| <b>Patient</b> | <b>Adverse Event</b>        | <b>Severity</b> | <b>Relationship to Study Drug</b> |
|----------------|-----------------------------|-----------------|-----------------------------------|
| 1              | pyrexia                     | Grade II        | unrelated                         |
| 1              | vomiting                    | Grade I         | unrelated                         |
| 1              | neutrophilia                | Grade I         | unrelated                         |
| 2              | extravasation blood         | Grade I         | unrelated                         |
| 2              | contusion                   | Grade I         | unrelated                         |
| 4              | respiratory tract infection | Grade II        | unrelated                         |

**Table S2.** Normal organ dosimetry analysis performed using OLINDA 1.0 EXM

| Organ / Parameter          | Absorbed Dose (mGy/MBq) |        |        |        |        | Mean $\pm$ SD<br>(n = 5) |
|----------------------------|-------------------------|--------|--------|--------|--------|--------------------------|
|                            | S00015                  | S00026 | S00028 | S00030 | S00031 |                          |
| Adrenal Glands             | 0.30                    | 0.39   | 0.56   | 0.26   | 0.45   | 0.39 $\pm$ 0.12          |
| Brain                      | 0.16                    | 0.19   | 0.22   | 0.12   | 0.21   | 0.18 $\pm$ 0.04          |
| Breasts                    | 0.16                    | 0.22   | 0.32   | 0.16   | 0.27   | 0.23 $\pm$ 0.07          |
| Gallbladder Wall           | 0.49                    | 0.61   | 0.85   | 0.40   | 0.48   | 0.56 $\pm$ 0.18          |
| Lower Large Intestine Wall | 0.54                    | 0.57   | 0.75   | 0.45   | 0.63   | 0.59 $\pm$ 0.11          |
| Small Intestine            | 0.59                    | 0.62   | 0.68   | 0.32   | 0.64   | 0.57 $\pm$ 0.14          |
| Stomach Wall               | 0.58                    | 0.68   | 1.05   | 0.56   | 0.64   | 0.70 $\pm$ 0.20          |
| Upper Large Intestine Wall | 0.50                    | 0.69   | 0.75   | 0.38   | 0.62   | 0.59 $\pm$ 0.15          |
| Heart Wall                 | 0.67                    | 0.84   | 0.71   | 0.59   | 0.88   | 0.74 $\pm$ 0.12          |
| Kidneys                    | 0.82                    | 0.71   | 1.00   | 0.47   | 0.79   | 0.76 $\pm$ 0.19          |
| Liver                      | 0.54                    | 0.79   | 1.51   | 0.40   | 0.67   | 0.78 $\pm$ 0.43          |
| Lungs                      | 0.29                    | 0.39   | 0.42   | 0.27   | 0.37   | 0.35 $\pm$ 0.06          |
| Muscle                     | 0.23                    | 0.35   | 0.38   | 0.23   | 0.39   | 0.32 $\pm$ 0.08          |
| Ovaries                    | 0.32                    | 0.41   | 0.50   | 0.27   | 0.47   | 0.39 $\pm$ 0.10          |
| Pancreas                   | 0.77                    | 0.59   | 0.79   | 0.51   | 0.82   | 0.70 $\pm$ 0.14          |
| Red Marrow                 | 0.37                    | 0.39   | 0.51   | 0.26   | 0.55   | 0.42 $\pm$ 0.12          |
| Osteogenic Cells           | 0.36                    | 0.43   | 0.58   | 0.30   | 0.57   | 0.45 $\pm$ 0.13          |
| Skin                       | 0.14                    | 0.20   | 0.27   | 0.14   | 0.24   | 0.20 $\pm$ 0.06          |
| Spleen                     | 0.85                    | 0.75   | 0.81   | 0.50   | 0.84   | 0.75 $\pm$ 0.15          |
| Testes                     | 0.19                    | 0.27   | 0.35   | 0.19   | 0.33   | 0.27 $\pm$ 0.08          |
| Thymus                     | 0.21                    | 0.30   | 0.39   | 0.21   | 0.36   | 0.30 $\pm$ 0.08          |
| Thyroid                    | 2.56                    | 1.39   | 1.76   | 2.82   | 2.54   | 2.21 $\pm$ 0.61          |
| Urinary Bladder Wall       | 0.81                    | 1.12   | 0.99   | 0.58   | 1.07   | 0.91 $\pm$ 0.22          |
| Uterus                     | 0.32                    | 0.43   | 0.51   | 0.27   | 0.48   | 0.40 $\pm$ 0.10          |
| Total Body                 | 0.26                    | 0.36   | 0.45   | 0.24   | 0.41   | 0.34 $\pm$ 0.09          |
|                            |                         |        |        |        |        |                          |
| ED Equivalent (mSv/MBq)    | 0.51                    | 0.54   | 0.68   | 0.41   | 0.63   | 0.55 $\pm$ 0.10          |
| ED (mSv/MBq)               | 0.51                    | 0.53   | 0.69   | 0.46   | 0.62   | 0.56 $\pm$ 0.09          |

The organs receiving the highest mean absorbed dose were the thyroid gland ( $2.21 \pm 0.61$  mGy/MBq), the urinary bladder wall ( $0.91 \pm 0.22$  mGy/MBq), the liver ( $0.78 \pm 0.43$  mGy/MBq), and the spleen ( $0.75 \pm 0.15$  mGy/MBq). The lowest mean absorbed dose was observed in the brain ( $0.18 \pm 0.04$  mGy/MBq). The results are consistent with no specific uptake of  $^{124}\text{I}$ -PEG-AVP0458 in normal organs, and some free  $^{124}\text{I}$  uptake in thyroid.

**Table S3.** Pharmacokinetic parameters AUC and Cmax for all <sup>124</sup>I-PEG-AVP0458 patients compared with ELISA PEG-AVP0458 data for all patients.

| Cohort<br>mg/m <sup>2</sup> | Patient     | AUC<br>(hr*µg/mL) | AUC<br>(hr*µg/mL) | Cmax<br>(µg/mL) | Cmax<br>(µg/mL)  |
|-----------------------------|-------------|-------------------|-------------------|-----------------|------------------|
|                             |             | ELISA             | <sup>124</sup> I  | ELISA           | <sup>124</sup> I |
| <b>1</b>                    | 1           | 2.9               | 10.86             | 0.1             | 0.36             |
|                             | 3           | 6.9               | 18.26             | 0.3             | 0.49             |
|                             | <b>Mean</b> | <b>4.9</b>        | <b>14.56</b>      | <b>0.2</b>      | <b>0.43</b>      |
|                             | <b>SD</b>   | <b>2.8</b>        | <b>5.23</b>       | <b>0.1</b>      | <b>0.09</b>      |
| T Test, P Value             |             | P = 0.148         |                   | P = 0.137       |                  |
| <b>10</b>                   | 4           | 162.8             | 151.65            | 3.2             | 5.14             |
|                             | 5           | 137.5             | 125.23            | 2.8             | 4.08             |
|                             | 6           | 116.4             | 179.94            | 3.3             | 3.78             |
|                             | <b>Mean</b> | <b>138.9</b>      | <b>152.3</b>      | <b>3.1</b>      | <b>4.3</b>       |
|                             | <b>SD</b>   | <b>23.2</b>       | <b>27.4</b>       | <b>0.3</b>      | <b>0.7</b>       |
| T Test, P Value             |             | P = 0.429         |                   | P = 0.052       |                  |

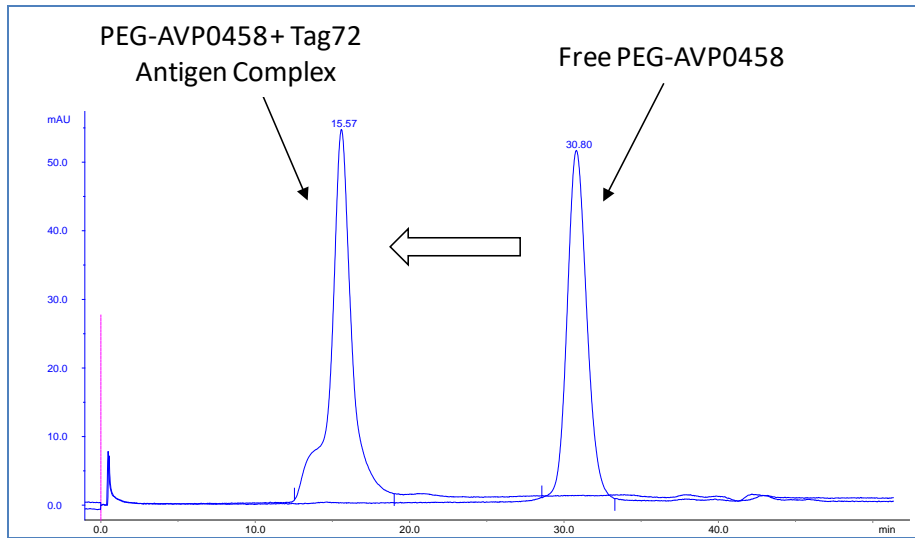

**Figure S1.** Column Shift assays to BSM (bovine submaxillary mucin), demonstrating full binding activity of AVP0458 retained after PEGylation.

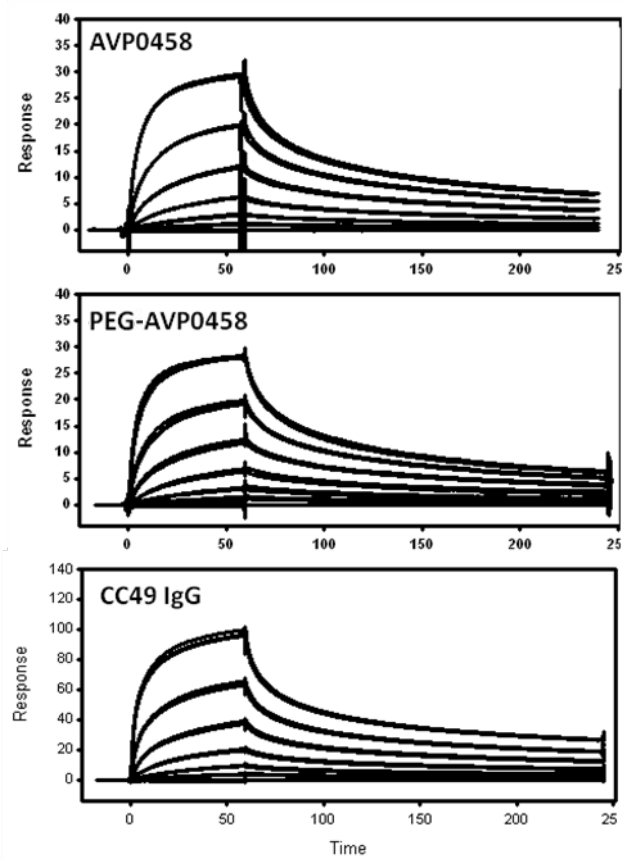

**Figure S2.** Biosensor curves for AVP0456, PEG-AVP0458, and CC49 against TAG-72 antigen.

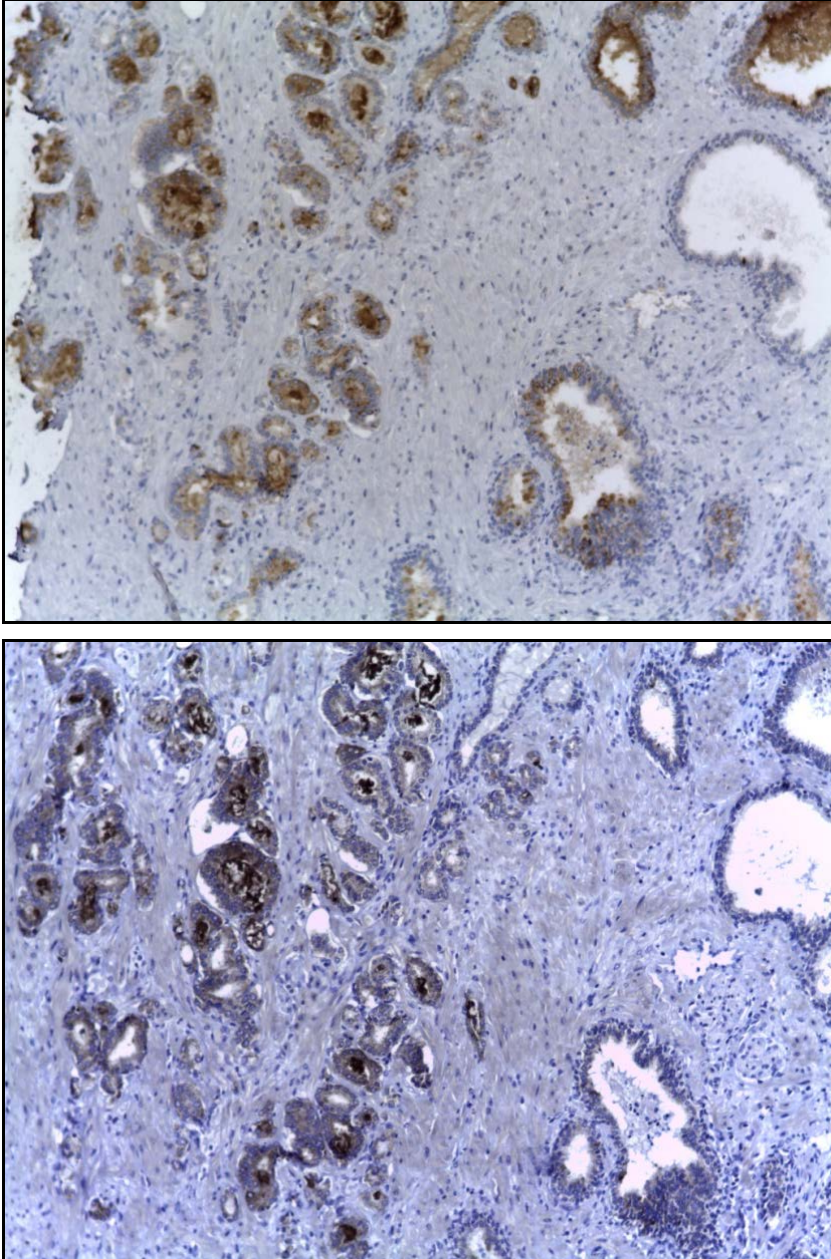

**Figure S3.** Immunohistochemical staining of serial sections of FFPE prostate cancer tissue with anti-TAG72 CC49 (top panel) and AVP0458-biotin (bottom panel). Original magnification, 200 $\times$ .
